1 **Genetic diversity in global chicken breeds as a function of genetic distance to**  
2 **the wild populations**

3 **Dorcus Kholofelo Malomane<sup>1,2\*</sup>, Steffen Weigend<sup>2,3</sup>, Armin Otto Schmitt<sup>2,4</sup>, Annett**  
4 **Weigend<sup>3</sup>, Christian Reimer<sup>1,2</sup>, Henner Simianer<sup>1,2</sup>**

5 <sup>1</sup>Animal Breeding and Genetics Group, Department of Animal Sciences, University of  
6 Goettingen, Goettingen, Germany

7 <sup>2</sup>Center for Integrated Breeding Research, Department of Animal Sciences, University of  
8 Goettingen, Goettingen, Germany

9 <sup>3</sup>Institute of Farm Animal Genetics, Friedrich-Loeffler-Institut, Neustadt, Germany

10 <sup>4</sup>Breeding Informatics Group, Department of Animal Sciences, Georg August-Universität  
11 Goettingen, Goettingen, Germany

12 \*[dmaloma@gwdg.de](mailto:dmaloma@gwdg.de)

13

14

15

16

17

18

19

20

21

22

23

24

## 25 **Abstract**

26 Migration of populations from their founder population is expected to cause a reduction in  
27 genetic diversity and facilitates population differentiation between the populations and their  
28 founder population as predicted by the theory of genetic isolation by distance. Consistent with  
29 that, a model of expansion from a single founder predicts that patterns of genetic diversity in  
30 populations can be well explained by their geographic expansion from the founders, which is  
31 correlated to the genetic differentiation. To investigate this in the chicken, we have estimated the  
32 relationship between the genetic diversity in 172 domesticated chicken populations and their  
33 genetic distances to wild populations. We have found a strong inverse relationship whereby  
34 87.5% of the variation in the overall genetic diversity of domesticated chicken can be explained  
35 by the genetic distance to the wild populations. We also investigated if different types of SNPs  
36 and genes present similar patterns of genetic diversity as the overall genome. Among different  
37 SNP classes, the non-synonymous ones were the most deviating from the overall genome.  
38 However, the genetic distances to wild populations still explained more variation in domesticated  
39 chicken diversity in all SNP classes ranging from 81.7 to 88.7%. The genetic diversity seemed to  
40 change at a faster rate within the chicken in genes that are associated with transmembrane  
41 transport, protein transport and protein metabolic processes, and lipid metabolic processes. In  
42 general, such genes are flexible to be manipulated according to the population needs. On the  
43 other hand, genes which the genetic diversity hardly changes despite the genetic distance to the  
44 wild populations are associated with major functions e.g. brain development. Therefore, changes  
45 in the genes may be detrimental to the chickens. These results contribute to the knowledge of  
46 different evolutionary patterns of different functional genomic regions in the chicken.

47

## 48 **Author summary**

49 The chicken was first domesticated about 6000 B.C. in Asia from the jungle fowl. Following  
50 domestication, chickens were taken to different parts of the world mainly by humans.  
51 Evolutionary forces such as selection and genetic drift have shaped diversification within the  
52 chicken species. In addition, new breeds or strains have been developed from crossbreeding  
53 programs facilitated by man. These events, together with other breeding practices, have led to  
54 genomic alterations causing genetic differentiation between the domesticated chickens and their  
55 ancestral/wild population as well as manipulation of the genetic diversity within the  
56 domesticated chickens. We investigated the relationship between 172 domesticated chicken  
57 populations from different selection, breeding and management backgrounds and their genetic  
58 distance to the wild type chickens. We found that the genetic diversity within the populations  
59 decreases with the increasing genetic distances to the wild types. Human manipulation of  
60 chicken genetic diversity has more effect on the genetic differentiation than simple geographic  
61 separations (through migrations) do. We further found that some genes associated with vital  
62 functions show evolutionary constraints or persistent selection across the populations and do not  
63 comply with this relationship i.e. the genetic diversity within the populations is constant despite  
64 the change in the genetic distance to the wild types.

65

66

67

68

## 69 **Introduction**

70 Domesticated chickens (*Gallus gallus domesticus*) are one of the most widely distributed  
71 domestic animal species in the world. Some of the reasons are due to their portability and  
72 flexibility of transportation through human migration, stock trading, and expansion in the  
73 agricultural practices [1, 2], in addition their use for nutrition is not suffering from any religious  
74 or cultural reservations. It is commonly accepted that the world-spread chickens of today  
75 originate predominantly from domestication of the red jungle fowl (*Gallus gallus* species) in  
76 Asia (reviewed by Tixier-Boichard et al [3]). From the centers of domestication, chickens have  
77 dispersed into different parts of the world. There has been formation of new breeds or lines as  
78 populations moved outward from ancestral territories and settled in new colonies. One of the  
79 expectations from such expansion processes is the increase of genetic distances (increased  
80 differentiation) of the outward populations to the original ancestors, and the loss of genetic  
81 diversity within such populations due to genetic drift and subsequent serial founder effects [4–6].  
82 In Malomane et al [7] we studied the overall genetic diversity between and within the chicken  
83 breeds. In the current study we aimed at investigating if the observed genetic diversity in the  
84 chicken breeds is a result of their genetic expansion from the chicken wild populations following  
85 the concepts behind the theory of genetic isolation by distance [8–10] and the model of  
86 expansion from a single location such as the ‘Out of Africa’ migration model [4]. The theory of  
87 genetic isolation by distance refers to the population genetic patterns whereby genetic  
88 differentiation increases with the increase in geographic distance between populations. This is  
89 because the exchange of genetic material between the populations (i.e. mating opportunities) is  
90 confined by the distance [8, 11]. Likewise, movements of individuals further apart from their  
91 founders would be expected to increase genetic differentiation. This has been established with

92 the ‘Out of Africa’ theory which asserts that modern humans originate from Africa [13] and  
93 human populations worldwide resulted in a reduction in genetic diversity with the increasing  
94 geographic distance from east Africa (Ethiopia) [4, 5, 14, 15]. Similar studies in cattle also  
95 reported a decreasing genetic diversity with increasing geographic distance to the cattle  
96 domestication center in Southwest Asia [16, 17].

97 The loss of genetic diversity within the migrated populations, which can be explained by the  
98 geographic distance from their founders, is believed to be a good measure of neutral genetic  
99 diversity as a consequence of genetic drift. However, the overall genetic diversity is also a result  
100 of population specific events such as mutations, natural selection to favor adaptation in the  
101 current environments and/or artificial selection (e.g. in livestock production practices) as well as  
102 population specific drift [5]. Consequences of selection are often measured by non-neutral  
103 genetic variation as it is assumed that non-neutral regions with functional fitness effects in the  
104 genome evolve differently to the neutral genome. In this study we used the global collection of  
105 chicken breeds [7] to investigate the pattern of the overall genetic diversity moving outwards the  
106 centers of chicken domestication, given all events taking place in the genome. Furthermore, we  
107 investigate if different functional regions of the genome present similar patterns as the overall  
108 genome. We hypothesized that changes in genetic diversity may be faster in some genes or  
109 functional categories depending on their functions and changes may also be different in different  
110 breeds or breed groups due to different adaptive or artificial selection targets. Therefore, the  
111 pattern of relationship between genetic diversity and genetic distance may behave differently,  
112 less complying with the overall genome and more dynamic than the non-genic regions due to  
113 differences in selection patterns in addition to other population specific events.

114 Studying the theory of genetic isolation by distance and/or the concept of migration from a single  
115 location with chickens poses some challenges because the physical locations do not always  
116 represent their geographic origin (following migration from founders). For many chicken breeds  
117 the time point when they have migrated to their current locations is unknown. We also believe  
118 that geographic distances may not be the best predictor of the genetic diversity in the chicken.  
119 This is because unlike in humans where genetic evolution is mostly driven by natural  
120 circumstances, rapid migration, crossbreeding forced by man, refined breeding programs and  
121 artificial selection for desired traits have largely shaped the evolution of domesticated chickens.  
122 The changes in genetic diversity and evolutionary rates are often rapid in domesticated livestock  
123 and the genetic architecture of chickens around the same geographic location may also differ  
124 greatly depending on different breeding practices or selection targets. Therefore, in our study we  
125 used Reynolds' genetic distances [19] instead of geographic distances but following similar  
126 concepts as the genetic isolation by distance and model of expansion from a single founder [5, 8,  
127 9]. Reynolds' distances estimate differences under the assumptions that genetic differentiation  
128 occurs by genetic drift.

129

## 130 **Results and discussion**

### 131 **The relationship between the overall genetic diversity and the genetic distance to wild** 132 **populations**

133 The relationship between the observed heterozygosity within domestic chicken (*Gallus gallus*  
134 *domesticus*) populations and the genetic distance to the wild populations (*Gallus gallus*) is  
135 shown in Fig 1. The different breed categories as described in the Materials and Methods section

136 and S1 Table are represented by symbols of different colours and shapes. There is a strong  
137 inverse relationship between the genetic diversity within populations and their genetic distances  
138 to the wild populations. This relationship is similar even when using just neutral markers  
139 (intergenic SNPs, Fig 2). Across these chicken populations, 87.5% (Table 1) of the total variation  
140 in the heterozygosity can be explained by the genetic distance to the wild populations. This  
141 figure is slightly higher than those obtained in several human studies when using geographic  
142 distances. Geographic distances of humans out of Africa explained 76.3% of microsatellite  
143 heterozygosity and 78.4% of fixation index  $F_{ST}$  variation in [5] and 85% of microsatellite  
144 heterozygosity in [15]. They had a correlation of -0.910 with SNP haplotype heterozygosity and -  
145 0.870 with microsatellite heterozygosity in the same study [20]. Furthermore, studies in humans  
146 have shown that there is a high correlation (e.g. 0.765 to 0.885 [5]) between the genetic distances  
147 (using different genetic distance measures) and geographic distance. However the correlations  
148 were not as high in domesticated cattle studies compared to humans. For example, a correlation  
149 of 0.624 was reported by [21] and while [16] reported a correlation of 0.750 for ancient cattle  
150 samples, the correlation was 0.540 in modern cattle samples. The weakening relationship  
151 between geographic and genetic distances in modern domesticated cattle was suggested to be due  
152 to the human manipulation of genetic diversity among other reasons, as it is with many  
153 domesticated livestock [16].

154 **Fig 1. The relationship between the overall genetic diversity within populations and their**  
155 **genetic distance to *Gallus gallus*.** The full names of the categories and description can be found  
156 in the S1 Table. The fitted regression line to the data with the equation heterozygosity = 0.563 -  
157 0.683 x (genetic distance to *G. gallus*) is drawn in red. The  $R^2$  for the linear regression is 0.875  
158 ( $p < 0.001$ ).

159

160 Since we had different population sizes whereby some population samples consisted of less than  
161 15 individuals, we checked if this affects the estimates. We estimated the genetic diversity when  
162 only populations with 15 or more individuals were considered and found that the population  
163 sizes did not affect the estimates. We also sampled 1000 SNPs in 100 replicates to validate that  
164 the relationship between heterozygosity and genetic distance does not happen by chance. The  
165 percentages of variation explained in the 100 replicates ranged from 85.1 to 88.3% with a mean  
166 of 86.7%. S1 Fig shows the regression plots of the 100 replicates with their 95% confidence  
167 intervals. Furthermore, we permuted the SNPs to investigate whether the decreasing  
168 heterozygosity is not generally an artefact of the Reynolds' distances. We found that the  
169 relationship between the observed heterozygosity and the genetic distance based on permuted  
170 SNPs was almost non-existing with an  $R^2$  value of 0.01. We also used the fixation index ( $F_{ST}$ ) as  
171 an alternative measure of differentiation, and found the Mantel correlation coefficient ( $r_m$ ) of  
172 pairwise  $F_{ST}$  values with the corresponding Reynolds' distances to be 0.976. Reynolds' genetic  
173 distances to the wild populations (*G. gallus*) and the  $F_{ST}$  values were highly correlated with a  
174 Pearson's  $r = 0.990$  and their relationship is shown in S2 Fig with an  $R^2$  value of 0.990. When  
175 using  $F_{ST}$ , the genetic differentiation of the breeds from the wild populations (*G. gallus*)  
176 explained 86.2% of the variation in genetic diversity (S2 Fig).

177 Given our results we can conclude that the variance in genetic diversity within the domesticated  
178 chicken populations can be well explained by the genetic distance to the *Gallus gallus*. Although  
179 our current study may not directly prove this due to lack of geographic sampling coordinates,  
180 given the whole data set it is evident that the geographic distance alone may not well predict the  
181 observed genetic variations in the chickens because:



182 i. breeds of the same geographic origin are found scattered across the genetic diversity  
183 spectrum. This is the case for Asian (red symbols) and European (green symbols) type  
184 breeds. As it is shown in Fig 1 and as well highlighted in [7], the Asian and European  
185 chickens sampled from the German fancy breeders (denoted with prefix DE\_) have highly  
186 reduced genetic diversity as well as higher genetic distance to the wild chickens (*G. gallus*)  
187 than their respective local breeds. However, when considering the sampling areas, the genetic  
188 diversity may correlates to the geographic distances to the *G. gallus* within the Asian breed  
189 categories but not in the European breeds. Many of the fancy breeds presumably originate  
190 from a small number of breeding birds imported from Asia to Europe. Following that, they  
191 have been subjected to strong phenotypic selection, with small effective population sizes,  
192 population bottlenecks, and intended inbreeding to keep the desired traits. Therefore, such  
193 practices are responsible for most of the variations in the genetic diversity of the fancy Asian  
194 and European type breeds vs. the respective local types.

195 ii. the concept of isolation by distance assumes that individuals from nearby locations are likely  
196 to be related due to mating possibilities. This is often the case in traditional breeding systems  
197 but it is not the case with the fancy and commercial breeding and management practices.  
198 Individuals within a commercial breeding herd are more related to each other than to other  
199 lines despite the geographic distances. In fancy breeds, there may be gene flow between  
200 small stocks based on personal contacts or personal relationships of breeders, but not related  
201 to geographic distance forming a substructure within the breed. Actually such gene flow  
202 between fancy breeds is also very limited. Furthermore, if geographic distance was a better  
203 predictor for the loss of genetic diversity and increased differentiation of breeds to the wild  
204 populations, then the African and South American breeds might be expected to have highly

205 reduced genetic diversity due to geographic distances. They also would be expected to have  
206 high genetic distances to the wild populations as well as to the rest of the Asian populations;  
207 in fact, both expectations are not fulfilled, and some of the African populations were found to  
208 be clustered with the wild type breeds [7].

209 Therefore, the observed variations in genetic diversity may not well be predicted only by  
210 geographic expansion but rather by a combination with other aspects or subsequent events e.g.  
211 effective population sizes, types of breeding practices, and possibly subsequent series of founder  
212 events following the geographic expansion, as previously suggested [5, 6]. Such events which  
213 have taken place after geographic expansion have definitely contributed to the variations in allele  
214 frequencies and thus the genetic distances of domestic chickens to the wild populations. In  
215 addition, equilibrium between genetic drift, migration and mutation has probably not been  
216 reached in all studied populations, which would be compatible with the theory of genetic  
217 isolation by distance [5, 8, 9]. The theoretical expansion models are also based on ‘natural’  
218 expansion through migration, while chickens and other livestock were actively transported by  
219 humans (e.g. with ships) to distant places.

220 **Comparisons of the patterns of genetic diversity between the overall genome (all SNPs) and**  
221 **different functional SNP classes.**

222 We compared the patterns of the relationship between the genetic diversity and genetic distances  
223 to the *Gallus gallus* species when using the overall SNPs to that from different SNP classes as  
224 shown in Fig 2 and Table 1. The rate of change in genetic diversity due to the genetic distance to  
225 the wild populations is represented by the slope in column 4. Compared to other SNP classes, the  
226 non-synonymous class showed a relevant deviation from the overall pattern whereby the  
227 observed heterozygosity across the breeds was lower than that of the overall genome. The non-

228 synonymous class also had the most deviating slope among the classes (-0.624 compared to -  
229 0.683 for all SNPs). To investigate if the different pattern in the non-synonymous class is not due  
230 to the sample size, we resampled the same number of SNPs as in the non-synonymous class (1  
231 082 SNPs) from the overall set (156K SNPs) 100 times. We estimated the heterozygosity and  
232 plotted the 100 samples to compare with the non-synonymous set. It is shown in S3 Fig that the  
233 difference in pattern of the non-synonymous class to the overall genome pattern is not due to the  
234 sample size.

235 **Fig 2. Genetic diversity within populations estimated from different SNP classes vs. their**  
236 **Reynolds' genetic distance to *Gallus gallus* ssp.** The red circles represent the 172 domesticated  
237 populations for the corresponding SNP class. Dashed black lines represent the regression lines  
238 for the relationship between observed heterozygosity and the genetic distance to *G. gallus* for the  
239 overall pattern and the red lines are for the SNP classes. The areas shaded in gray represent a  
240 95% confidence interval. The R<sup>2</sup> values and slopes of the linear relationships are shown in Table  
241 1. UTR5 and UTR3 refer to the 5' and 3' UTR classes, respectively.

242

243

244

245

246

247

248

249

250

251

252

253

254 **Table 1. Comparisons of the linear relationship between genetic diversity and genetic**  
255 **distances of populations to *Gallus gallus* ssp. for different SNP classes.**

| SNP class      | Number of SNPs | R <sup>2</sup> | Slope  | SE of slope | Likelihood ratio $\chi^2$ – test |
|----------------|----------------|----------------|--------|-------------|----------------------------------|
| Overall SNPs   | 156 753        | 0.875          | -0.683 | 0.020       |                                  |
| Non-synonymous | 1 082          | 0.871          | -0.624 | 0.018       | p < 0.001                        |
| Synonymous     | 3 891          | 0.887          | -0.690 | 0.019       | p < 0.001                        |
| Exonic         | 5 959          | 0.885          | -0.676 | 0.019       | p < 0.001                        |
| Intronic       | 71 175         | 0.876          | -0.687 | 0.020       | p > 0.050                        |
| 5' UTR         | 118            | 0.817          | -0.650 | 0.020       | p < 0.001                        |
| 3' UTR         | 1 383          | 0.864          | -0.663 | 0.020       | p > 0.050                        |
| Upstream       | 11 559         | 0.871          | -0.688 | 0.020       | p < 0.050                        |
| Downstream     | 8 777          | 0.871          | -0.683 | 0.024       | p > 0.050                        |
| Intergenic     | 57 782         | 0.872          | -0.677 | 0.020       | p > 0.050                        |

256 The number of exonic SNPs is the sum of non-synonymous and synonymous SNPs plus the  
257 coding and non-coding exonic SNPs which were not assigned to neither the non-synonymous nor  
258 synonymous classes. All R<sup>2</sup> values are significant, p < 0.001. SE – standard error.

259

260 Furthermore, the intergenic and intronic classes had the highest proportion of SNPs than the  
261 other SNP classes (Table 1). In order to validate that the similarity of these two classes to the  
262 overall is not an artefact of the sample sizes, we sampled 1000 SNPs a 100 times from the  
263 intergenic and intronic classes (separately). Then we estimated the heterozygosity and compared  
264 the results to the overall SNPs, showing that the similarities are not due to the larger sample sizes  
265 (S4 and S5 Figs). In comparing the regression models using the likelihood ratio test, the exonic  
266 (including both the synonymous and non-synonymous separately) and 5' UTR SNP classes  
267 showed highly significant differences to the overall SNPs (p < 0.001, Table 1 last coloumn).  
268 Nonetheless, all SNP classes show a reduction in genetic diversity across populations with the

269 increase in genetic distance to the wild types, with the  $R^2$  values ranging from 81.7% to 88.7%.  
270 The results show that for the synonymous SNPs, 88.7% of the variation in the heterozygosity  
271 across populations can be explained by their genetic distance to *G. gallus* while in the non-  
272 synonymous sites it explains 87.1%, and the lowest percentage was observed for 5' UTR  
273 (81.7%). However, it is important to note that the 5' UTR class had only 118 SNPs and hence the  
274 differences could be an effect of the sample size. To test this, we have randomly sampled 118  
275 SNPs in 100 replicates from the overall set and estimated the relationship as we have done with  
276 the non-synonymous SNPs, and the  $R^2$  of the replicates ranged from 77.9% to 86.5% with a  
277 mean of 81.7%, suggesting that this result is most likely an artefact caused by small sample size.

278 Fig 3 shows the mean observed heterozygosity in the different SNP classes. Generally, the  
279 observed heterozygosity was lower in genic than in non-genic SNP classes. Within the genic  
280 class, lower heterozygosity was observed in exonic than in intronic SNPs. Consistent with Fig 2,  
281 the non-synonymous SNPs presented the lowest genetic diversity among all the SNP classes.  
282 This could be expected since non-synonymous changes can present favourable or disadvantageous  
283 consequences. The theoretical assumption is that selection acts rapidly towards fixation of the  
284 favourable alleles and purging of the non-favourable ones, thus leading to more homozygosity in  
285 these protein altering variants. The exonic and 5' UTR classes followed the non-synonymous  
286 class with lowest mean heterozygosity. UTR variants can play a role in the regulation of gene  
287 expression and translation. For example, 3' UTR could interfere with microRNA to facilitate the  
288 translation of critical disease genes (e.g. cancer genes in humans) [22, 23]. It is also claimed that  
289 positive selection for the adaptation of humans in different habitats has been achieved with high  
290 differentiation in the 5' UTR gene variants [24]. Such examples highlight the importance of UTR  
291 variants as possible targets for selection.

292 **Fig 3. The mean observed heterozygosity in the different SNP classes.** The gray dotted lines  
293 represent the overall mean observed heterozygosity when all SNPs are considered. Non-syn –  
294 Non-synonymous. The mean heterozygosities of the SNP classes were significantly different to  
295 the overall mean (Welch two sample t-test  $p < 0.05$ ) except for the 3' UTR and 5' UTR classes.  
296 The standard errors (SEs) of the means were lower than 0.005 in all the SNP classes and the  
297 overall except for the 5' UTR with  $SE = 0.009$ . Different letters in the bars means that there is  
298 significant difference in the mean heterozygosity within the same level, e.g. difference between  
299 'Non-genic' and 'Genic' classes on the first level or difference between 'Non-synonymous' and  
300 'Synonymous' classes on the third level.

301

### 302 **Patterns of genetic diversity in different genes**

303 We have investigated the patterns of genetic diversity in those 6 303 chicken genes, for which at  
304 least 10 SNPs were mapped to the gene, in comparison to the overall genetic diversity pattern. In  
305 particular, we wanted to find out if the decrease in genetic diversity is faster or slower in certain  
306 genes. The results for all the 6 303 genes are presented in S2 Table including the  $R^2$  and slope  
307 values. Reliabilities ( $R^2$ ) of the linear regression of the genetic distance from the wild ancestor on  
308 heterozygosity for the genes ranged from 0.036 to 0.701 with a mean  $R^2$  of 0.450 and the slopes  
309 ranged from -0.110 to -1.099. However, the  $R^2$  values were correlated to the number of SNPs  
310 within the genes with  $r = 0.562$ . The slopes were independent of the SNP numbers within genes  
311 with  $r = 0.026$ . The correlation between the slopes and  $R^2$  values was -0.556. We evaluated the  
312 regression coefficients (slopes) of the relationship between the heterozygosity and genetic  
313 distance for the genes in the top and lowest 5% ranges, which were in total 32 genes at each end.  
314 Based on these slope classifications, functional annotations of the genes were done for the  
315 combination of molecular function, biological and immune system processes as well as KEGG  
316 pathways using the ClueGo package. Based on the ClueGo results, none of the genes in the top  
317 5% range formed any functional clusters while 4 of the genes (namely: EGFR, PAFAH1B1,  
318 PTPRS and RTN4) in the lowest 5% were associated with brain development.

319 Genes in the lowest 5% had slopes ranging from -0.110 to -0.319 while the top 5% ranged from -  
320 0.960 to -1.099 (S3 Table). The genes in the top 5% indicate rapid changes in genetic diversity  
321 due to the genetic distance of the chicken breeds to *G. gallus* while those in the lowest 5%  
322 indicate genetic diversity changes at a very slow rate in relation to the genetic distance. We  
323 obtained the individual gene functions for these genes in the lowest and top ranges from DAVID  
324 annotation platform (S3 Table). The figures showing the relationship between genetic diversity  
325 and genetic distance in these genes are shown in S1 File and S2 File for the top and lowest 5%  
326 ranges, respectively.

327 The genes in the top 5% slope range were associated with transmembrane transport (SLC25A6,  
328 SLC22A15, SLC4A3), protein transport and protein metabolic processes (SLMO1, ERO1L,  
329 UCHL5, KCNB1, CSE1L), and lipid metabolic processes (PLCXD1, MIR33, HADHA) among  
330 other functions. The transmembrane transport refers to the transportation of solute/s across the  
331 protein embedded lipid bilayer. The lipid bilayer facilitates the distribution of molecules such as  
332 ions and proteins between different membrane compartments by allowing them to cross to  
333 different areas only when it is necessary [25]. Proteins are responsible to perform a wide range of  
334 important biochemical functions including those relating to adaptation, survival and  
335 performance. Proteins and lipids are also core biological molecules of living organisms and key  
336 molecules for energy generation. The energy and nutrient requirements differ for different types  
337 of breeds or strains and are as well influenced by other factors such as breeding goals and  
338 management systems [26, 27]. Hence the high flexibility of these genes to change may also be  
339 associated with such factors in addition to the change in genetic diversity which was initially due  
340 to the populations' physical expansion from the *G. gallus*. In general, these genes are flexible to  
341 change without necessarily causing harm to the individuals but probably to complement the

342 evolution of the populations. The genes in this range had  $R^2$  ranging from 0.419 to 0.628  
343 indicating the good association of the genetic diversity and the genetic distance to the wild  
344 populations.

345 Most of the genes in the lowest 5% slope range have consistently lower genetic diversity across  
346 the breeds despite the genetic distance to the *Gallus gallus* (see S2 File) and they are mainly  
347 related to critical functions which may be absolutely necessary for normal functioning of the  
348 individuals. Among all the genes, the slopes were the lowest and much closer to zero for the  
349 DPYSL2 (-0.112) and GRB2 (-0.110) genes which also had the lowest  $R^2$  values of 0.036 and  
350 0.038, respectively among all the genes. The GRB2 gene, which is involved in many pathways  
351 and functional processes, is assumed to be highly conserved in chicken as well as in humans and  
352 was reported to be under very strong evolutionary constraint [28]. Other than some of the genes,  
353 which are mentioned above for being related to the development of the brain, genes in the lowest  
354 5% range were also found to be associated with other important developmental processes,  
355 functions and pathways. Such include positive regulation of cell proliferation (NTF3, ESRP2,  
356 EGFR, FGFR1), positive regulation of reactive oxygen species metabolic process (GRB2,  
357 STK17A), regulation of cell death, cell and structure morphogenesis (GRB2, NTF3, DOCK5,  
358 EGFR, STK17A), positive regulation of reproduction (GNRH1), development of spinal cord  
359 (PTPRS), salivary gland morphogenesis (FGFR1, ESRP2, EGFR), lung morphogenesis (FGFR1,  
360 ESRP2), brain morphogenesis and development (FGFR1, PAFAH1B1, DPYSL2), axon  
361 development (NEFM, RAB8A, RTN4, DPYSL2) among others functions. ADAM28 belongs to  
362 the family of ADAMs genes, being a family of transmembrane proteins involved in several  
363 processes including embryonic morphogenesis and tissue development, neurogenesis, cell  
364 adhesion, cell migration, axon outgrowth and guidance, cell proliferation and cell differentiation



365 during development [29]. In humans, the ADAMs are said to be involved in the regulation of  
366 growth factor activities, promoting cell growth and invasion. They may alter cell communication  
367 or signaling in cancer cells causing an increase in cancer cell proliferation and progression [30].  
368 The allele frequency in our study showed a very rapid fixation of the alternative allele in the  
369 ADAM28 in all breed categories supporting the assumption that the mutations might be of  
370 importance. In general, the consistent lower genetic diversity in the lowest 5% slope range and  
371 limited/lack of response to the changes in genetic distance to *G. gallus* can be due to several  
372 reasons such as i) some genes may be under evolutionary constraints such that changes of the  
373 genes may be generally critical for normal development or functioning of the animal and changes  
374 in the genes may have detrimental effects. ii) Purifying selection may be acting to remove the  
375 non-favorable alleles and is, therefore, leading to rapid fixation of the other allele. iii) On the  
376 other hand, genetic diversity might have been already reduced from the founders i.e. selection  
377 and fixation of the preferred variants took place prior to domestication; hence no or less  
378 feasibility for further reduction in genetic diversity is being possible. In this line, we investigated  
379 the genes which have the lowest estimated heterozygosity within the *Gallus gallus* populations.  
380 We found out that 27 of the 32 genes in the lowest 5% slope range were among genes with the  
381 lowest 1% of estimated heterozygosity within *Gallus gallus*. Furthermore, seven of those 27  
382 genes also were among the genes with the lowest 5% of estimated heterozygosity within all  
383 breed categories.

384 We have analyzed the patterns of genetic diversity within a wide range of chicken breeds as a  
385 function of genetic distances from the chicken wild types. Given all forces taking place in the  
386 genome, we can conclude that the overall genetic diversity in the chicken can be well explained  
387 by the genetic distance to the wild populations. However, different functional genomic regions,

388 genes and pathways have shown different evolutionary dynamics across the breeds resulting in  
389 different patterns of the genetic diversity compared to the overall genome and the neutral loci.  
390 The non-synonymous sites in particular have shown to be the most deviating from the overall  
391 pattern of genetic diversity compared to other genomic sites. Furthermore, we have found that  
392 genetic diversity changed at a faster rate in genes which are flexible to be manipulated according  
393 to the population needs e.g. genes involved in energy metabolism. On the other hand, genes  
394 which show resistance to change are associated with critical vital functions e.g. brain  
395 development, crucial for normal functioning of the individuals. Such genes presumably have  
396 maintained similar low levels of genetic diversity across all populations by selection or by  
397 evolutionary constraints, and the variations or the lack thereof in the genomic diversity between  
398 the breeds (within these genes) does not reflect the genetic distances to the wild type populations.  
399 This study presents insights and contributes to the knowledge of evolutionary dynamics of  
400 different functional genomic regions in the chicken.

401

## 402 **Materials and Methods**

### 403 **Ethics statement**

404 The data used was derived from a previous study [7], sourced from the SYNBREED  
405 (<http://www.synbreed.tum.de/>) project which was funded by the German Federal Ministry of  
406 Education and Research (FKZ 0315528E). Sampling of chickens followed the German Animal  
407 Welfare regulations, the authorities of Lower Saxony were notified according to §8 of the  
408 German Animal Welfare Act (33.9-42502-05-10A064) and with the written consent of the  
409 animal owners.

## 410 **Data description and quality control**

411 Data consisted of 3 235 chicken individuals from 174 chicken populations collected in Asia,  
412 Africa, South America and Europe. The populations were classified into twelve breed categories  
413 which were based on their continent of origin and/or type as described in S1 Table. The chickens  
414 were genotyped with the 600K Affymetrix® Axiom™ Genome-Wide Chicken Genotyping  
415 Array [31]. We used only the SNPs from the 28 autosomal chromosomes and removed 499 SNPs  
416 with ambiguous chromosome annotation. The data was filtered for an animal call rate of  $\geq 95\%$   
417 and SNP call rate of  $\geq 99\%$  using the SNP & Variation Suite (SVS) version 8.1 [32]. We  
418 performed LD based pruning to account for ascertainment bias [33] using the PLINK  
419 software v1.9 [34, 35] with the parameters *indep 50 5 2*. After the filtering steps 156 753 SNPs  
420 were left for further analysis and imputation was performed to recover missing genotypes using  
421 Beagle 3.3 [36]. A further description of the data can be found in Malomane et al. [7].

## 422 **Classification of the SNPs**

423 We classified SNPs according to their functional consequences and assigned them to their  
424 associated genes using the Affymetrix Galgal5 annotation map [37]. SNPs were classified into  
425 the following categories: non-synonymous which is made of the missense and nonsense (only  
426 eight in total) variants, synonymous, exonic (a combination of the non-synonymous and  
427 synonymous SNPs as well as other coding and non-coding exonic SNPs which were not assigned  
428 as non-synonymous or synonymous), intronic, 5' untranslated region (5' UTR), 3' untranslated  
429 region (3' UTR), upstream, downstream and intergenic classes. SNPs assignments were  
430 prioritized in the order as they appear on Table 1. For example, if one SNP is associated with two  
431 genes but has different functional consequences for the two genes (e.g. non-synonymous for one

432 gene and synonymous for the other gene) then a non-synonymous functional consequence was  
433 considered first instead of the other consequences, followed by synonymous and so forth. As for  
434 the up- and downstream variants, a SNP was assigned to the upstream class if it was located  
435 within 5 kb upstream of the gene and in analogy for the downstream SNPs. The distribution of  
436 SNPs into their functional classes is shown in column 1 of Table 1.

437 For assigning SNPs to individual genes, the 156K SNPs were mapped to a total of 10 456  
438 associated genes [37].

### 439 **Estimation of genetic diversity outward from wild populations**

440 Two subspecies of the wild populations (*Gallus gallus*), the *G. gallus spadiceus* and *G. gallus*  
441 *gallus*, sampled about 20 years ago were used as reference for original founders, and reflect  
442 genetic diversity in centers of domestication.

443 We estimated the pairwise Reynolds' genetic distances [19] between the two wild type  
444 populations (*G. gallus* ssp.) and the domesticated populations, and then calculated the mean  
445 genetic distance of each domesticated population to the two wild populations. Furthermore,  
446 observed heterozygosity was estimated within each population. Then, we estimated the linear  
447 relationship between the overall genetic diversity within the domesticated populations and their  
448 mean genetic distances to the two wild type populations. The amount of variation in genetic  
449 diversity within the populations which can be explained by the genetic distance was measured by  
450 the  $R^2$  value. To investigate if different SNP classes and genes show similar patterns as the  
451 overall genome pattern (when using all SNPs), we also estimated the genetic diversity in the  
452 different SNP classes and in genes and subsequently estimated the linear relationship with the  
453 genetic distances to the wild populations. We used the likelihood ratio test implemented in the R

454 lmtest package (v0.9-36) [38] which uses the  $\chi^2$  test to compare the linear regression  
455 coefficients of the overall pattern to the patterns of the different SNP classes.

456 For the individual genes, because some of the genes were annotated with only one or very few  
457 associated SNPs while others were annotated with more, we only considered genes with at least  
458 ten associated SNPs (resulting in 6 303 in total) for making comparisons with the overall pattern.  
459 We evaluated the rate of change in the genetic diversity within the genes due to the change in  
460 genetic distances of populations to the wild populations using the regression coefficients of the  
461 linear relationship between the two parameters.

#### 462 **Functional annotation of genes**

463 Genes within the lowest and highest 5% ranges of regression coefficients in the relationship  
464 between genetic diversity within populations and genetic distances to the wild populations were  
465 grouped into functional terms using the ClueGO (v2.5.1) [39] ontology enrichment package in  
466 Cytoscape (v3.6.1) [40]. Additionally, individual gene functions were annotated using the  
467 DAVID functional annotation tool (v6.8) [41].

#### 468 **Acknowledgements**

469 We acknowledge the members of the SCDP consortium as well as the breeders of the “Bund  
470 Deutscher Rassegeflügelzüchter e.V.” and the “Gesellschaft zur Erhaltung alter und gefährdeter  
471 Haustierrassen e.V” in Germany for providing samples or SNP data, or gave access to their  
472 animals for sampling.

473

474

## 475 **Supporting information**

476 **S1 Table. Categories of the chicken breeds. (DOCX)**

477 **S2 Table. The  $R^2$  and slope values of the relationship between genetic diversity and genetic**  
478 **distances of populations to *Gallus gallus* ssp. estimated from the 6 303 genes. (XLSX)**

479 **S3 Table. List and functions of the genes in the top and lowest 5% slope ranges. (DOCX)**

480 **S1 Fig. Genetic diversity vs. Reynolds' genetic distance to the *Gallus gallus* estimated from**  
481 **1000 SNP samples in 100 replicates.** The dashed lines represent the 100 sample sets and the  
482 gray area shows a 95% confidence interval. (TIF)

483 **S2 Fig. The relationship between the observed heterozygosity and genetic differentiation ( $F_{ST}$ )**  
484 **from *G. gallus* (left), and the relationship between  $F_{ST}$  and Reynolds' genetic**  
485 **distances to *G. gallus* (right).** The regression lines of the relationships are drawn in red. The  $R^2$   
486 of the left figure is 0.862 and 0.990 for the right figure. Different breed categories are denoted in  
487 different colors and/or shapes. (TIF)

488 **S3 Fig. Comparison of the relationship between the genetic distances to *G. gallus* and the**  
489 **genetic diversity estimated from the non-synonymous class vs. 100 random samples of the**  
490 **same number of SNPs as the non-synonymous class from the overall SNPs.** The black dotted  
491 lines represent estimations with the overall SNPs, the red solid line represents the non-  
492 synonymous SNPs. The shaded areas represent the 95% confidence intervals of the regression  
493 lines. The mean  $R^2$  of the 100 samples is 0.869 and the mean slope is -0.684. (TIF)

494 **S4 Fig. Comparison of the relationship between the genetic distances to *G. gallus* and the**  
495 **observed heterozygosity estimated from intronic SNPs vs. the overall set.** The black dashed  
496 lines represent estimations with the 100 replicates from randomly sampling 1000 SNPs from the  
497 intronic SNPs and the red solid line represents overall SNPs. The 95% confidence intervals are  
498 shaded in gray. The mean  $R^2$  and slope of the 100 samples are 0.869 and -0.686, respectively.  
499 (TIF)

500 **S5 Fig. Comparison of the relationship between the genetic distances to *G. gallus* and the**  
501 **observed heterozygosity estimated from intergenic SNPs vs. the overall set.** The black  
502 dashed lines represent estimations with the 100 replicates from randomly sampling 1000 SNPs  
503 from the intergenic SNPs and the red solid line represents overall SNPs. The 95% confidence  
504 intervals are shaded in gray. The mean  $R^2$  and slope of the 100 samples are 0.865 and -0.678,  
505 respectively. (TIF)

506 **S1 File.** Figures showing the relationship between genetic diversity and genetic distance to *G.*  
507 *gallus* for genes in the top 5% slope range. (ZIP file containing TIF figures)

508 **S2 File.** Figures showing the relationship between genetic diversity and genetic distance to *G.*  
509 *gallus* for genes in the lowest 5% slope range. (ZIP file containing TIF figures)

510

## 511 **References**

- 512 1. Wragg D, Mwacharo JM, Alcalde JA, Hocking PM, Hanotte O. Analysis of genome-wide  
513 structure, diversity and fine mapping of Mendelian traits in traditional and village  
514 chickens. *Heredity*. Nature Publishing Group; 2012;109: 6–18. doi:10.1038/hdy.2012.9
- 515 2. Mwacharo JM, Bjørnstad G, Mobegi V, Nomura K, Hanada H, Amano T, et al.  
516 Mitochondrial DNA reveals multiple introductions of domestic chicken in East Africa.  
517 *Mol Phylogenet Evol*. Elsevier Inc.; 2011;58: 374–382. doi:10.1016/j.ympev.2010.11.027
- 518 3. Tixier-Boichard M, Bed’Hom B, Rognon X. Chicken domestication: From archeology to  
519 genomics. *C R Biol*. 2011;334: 197–204. doi:10.1016/j.crv.2010.12.012
- 520 4. Deshpande O, Batzoglou S, Feldman MW, Luca Cavalli-Sforza L. A serial founder effect  
521 model for human settlement out of Africa. *Proc R Soc B Biol Sci*. 2009;276: 291–300.  
522 doi:10.1098/rspb.2008.0750
- 523 5. Ramachandran S, Deshpande O, Roseman CC, Rosenberg NA, Feldman MW, Cavalli-  
524 Sforza LL. Support from the relationship of genetic and geographic distance in human  
525 populations for a serial founder effect originating in Africa. *Proc Natl Acad Sci*. 2005;102:  
526 15942–15947. doi:10.1073/pnas.0507611102
- 527 6. Hunley KL, Healy ME, Long JC. The global pattern of gene identity variation reveals a  
528 history of long-range migrations, bottlenecks, and local mate exchange: Implications for  
529 biological race. *Am J Phys Anthropol*. 2009;139: 35–46. doi:10.1002/ajpa.20932
- 530 7. Malomane DK, Simianer H, Weigend A, Reimer C, Schmitt AO, Weigend S. The  
531 SYNBREED chicken diversity panel : A global resource to assess chicken diversity at  
532 high genomic resolution. *BMC Genomics*; 2019;20: 345.
- 533 8. Malécot G. *The mathematics of heredity*. Translated by Yermanos DM. San Francisco,  
534 CA USA: Freeman; 1969.
- 535 9. Wright S. Isolation by Distance. *Genetics*. 1943;28: 114–138.
- 536 10. Ishida Y. Sewall Wright and Gustave Malécot on Isolation by Distance. *Philos Sci*.  
537 2009;76: 784–796. doi:10.1086/605802
- 538 11. Cavalli-Sforza LL, Barrai I, Edwards AWF. Analysis of human evolution under random  
539 genetic drift. *Cold Spring Harb Symp Quant Biol*. 1964;29: 9–20.  
540 doi:10.1101/SQB.1964.029.01.006
- 541 12. Aguilon SM, Fitzpatrick JW, Bowman R, Schoech SJ, Clark AG, Coop G, et al.  
542 Deconstructing isolation-by-distance: The genomic consequences of limited dispersal.  
543 *PLoS Genet*. 2017;13: e1006911. doi:10.1371/journal.pgen.1006911

- 544 13. Stringer C, Andrews P. Genetic and fossil evidence for the origin of modern humans.  
545 Science. 1988;239: 1263–1268. doi:10.1126/science.3125610
- 546 14. Pemberton TJ, DeGiorgio M, Rosenberg NA. Population Structure in a Comprehensive  
547 Genomic Data Set on Human Microsatellite Variation. *G3 Genes, Genomes, Genet.*  
548 2013;3: 891–907. doi:10.1534/g3.113.005728
- 549 15. Prugnolle F, Manica A, Balloux F. Geography predicts neutral genetic diversity of human  
550 populations. *Curr Biol.* 2005;15: R159–R160. doi:10.1016/j.cub.2005.02.038.
- 551 16. Scheu A, Powell A, Bollongino R, Vigne JD, Tresset A, Çakırlar C, et al. The genetic  
552 prehistory of domesticated cattle from their origin to the spread across Europe. *BMC*  
553 *Genet.* 2015;16: 54. doi:10.1186/s12863-015-0203-2
- 554 17. Utsunomiya Y, Bomba L, Lucente G, Colli L, Negrini R, Lenstra J, et al. Revisiting AFLP  
555 fingerprinting for an unbiased assessment of genetic structure and differentiation of  
556 taurine and zebu cattle. *BMC Genet.* 2014;15: 47. doi:10.1186/1471-2156-15-47
- 557 18. Slatkin M. Isolation by distance in equilibrium and non-equilibrium populations.  
558 *Evolution.* 1993;47: 264–279.
- 559 19. Reynolds J, Weir BS, Cockerham CC. Estimation of the coancestry coefficient: Basis for  
560 a short-term genetic distance. *Genetics.* 1983;105: 767–779.
- 561 20. Li JZ, Absher DM, Tang H, Southwick AM, Casto AM, Ramachandran S, et al.  
562 Worldwide human relationships inferred from genome-wide patterns of variation. *Science.*  
563 2008;319: 1100–1104. doi:10.1126/science.1153717
- 564 21. Wang Y. Genetic and Geographic Diversity of Gyr (*Bos Indicus*) Cattle in Brazil. M.Sc.  
565 Thesis. University of Natural Resources and Life Sciences, Vienna. 2015.
- 566 22. Nicoloso MS, Sun H, Riccardo Spizzo, Kim H, Wickramasinghe P, Shimizu M, et al.  
567 Single nucleotide polymorphisms inside microrna target sites influence tumor  
568 susceptibility. *Cancer Res.* 2010;70: 2789–2798. doi:10.1158/0008-5472.CAN-09-3541
- 569 23. Gong J, Tong Y, Zhang HM, Wang K, Hu T, Shan G, et al. Genome-wide identification of  
570 SNPs in MicroRNA genes and the SNP effects on MicroRNA target binding and  
571 biogenesis. *Hum Mutat.* 2012;33: 254–263. doi:10.1002/humu.21641
- 572 24. Barreiro LB, Laval G, Quach H, Patin E, Quintana-Murci L. Natural selection has driven  
573 population differentiation in modern humans. *Nat Genet.* 2008;40: 340–345.  
574 doi:10.1038/ng.78
- 575 25. Andersen OS, Koeppe RE. Bilayer thickness and membrane protein function: An  
576 energetic perspective. *Annu Rev Biophys Biomol Struct.* 2007;36: 107–130.  
577 doi:10.1146/annurev.biophys.36.040306.132643
- 578 26. Buzala M, Janicki B, Czarnecki R. Consequences of different growth rates in broiler  
579 breeder and layer hens on embryogenesis, metabolism and metabolic rate: A review. *Poult*  
580 *Sci.* 2015;94: 728–733. doi:10.3382/ps/pev015



- 581 27. Boschiero C, Costa G, Moreira M, Gheyas AA, Godoy TF, Gasparin G, et al. Genome-  
582 wide characterization of genetic variants and putative regions under selection in meat and  
583 egg-type chicken lines. *BMC Genomics*; 2018; 0–18. doi:10.1186/s12864-018-4444-0
- 584 28. Wasenius VM, Meriläinen J, Lehto VP. Sequence of a chicken cDNA encoding a GRB2  
585 protein. *Gene*. 1993;134: 299–300. doi:10.1016/0378-1119(93)90111-F
- 586 29. Lin J, Yan X, Markus A, Redies C, Rolfs A, Luo J. Expression of seven members of the  
587 ADAM family in developing chicken spinal cord. *Dev Dyn*. 2010;239: 1246–1254.  
588 doi:10.1002/dvdy.22272
- 589 30. Mochizuki S, Okada Y. ADAMs in cancer cell proliferation and progression. *Cancer Sci*.  
590 2007;98: 621–628. doi:10.1111/j.1349-7006.2007.00434.x
- 591 31. Kranis A, Gheyas AA, Boschiero C, Turner F, Yu L, Smith S, et al. Development of a  
592 high density 600K SNP genotyping array for chicken. *BMC Genomics*. 2013;14: 59.  
593 doi:10.1186/1471-2164-14-59
- 594 32. SNP & Variation Suite™ (Version 8.1). Bozeman, MT: Golden Helix, Inc. [cited 12 Mar  
595 2019]. Available from: <http://goldenhelix.com/>
- 596 33. Malomane DK, Reimer C, Weigend S, Weigend A, Sharifi AR, Simianer H. Efficiency of  
597 different strategies to mitigate ascertainment bias when using SNP panels in diversity  
598 studies. *BMC Genomics*; 2018;19: 22. doi:10.1186/s12864-017-4416-9
- 599 34. Purcell S, Chang C. PLINK 1.9 [Internet]. [cited 12 Mar 2019]. Available from:  
600 <https://www.cog-genomics.org/plink2>
- 601 35. Chang CC, Chow CC, Tellier LC, Vattikuti S, Purcell SM, Lee JJ. Second-generation  
602 PLINK: rising to the challenge of larger and richer datasets. *Gigascience*. 2015;4: 7.  
603 doi:10.1186/s13742-015-0047-8
- 604 36. Browning BL, Browning SR. A unified approach to genotype imputation and haplotype-  
605 phase inference for large data sets of trios and unrelated individuals. *Am J Hum Genet*.  
606 2008;84: 210–223. doi:10.1016/j.ajhg.2009.01.005
- 607 37. Warren WC, Hillier LW, Tomlinson C, Minx P, Kremitzki M, Graves T, et al. A New  
608 Chicken Genome Assembly Provides Insight into Avian Genome Structure. *G3 Genes,  
609 Genomes, Genet*. 2017;7: 109–117.
- 610 38. R Core Team. 2015 [cited 12 Mar 2019]. R: A language and environment for statistical  
611 computing. R Foundation for Statistical Computing, Vienna, Austria. Available from:  
612 <https://www.R-project.org/>.
- 613 39. Bindea G, Mlecnik B, Hackl H, Charoentong P, Tosolini M, Kirilovsky A, et al. ClueGO:  
614 A Cytoscape plug-in to decipher functionally grouped gene ontology and pathway  
615 annotation networks. *Bioinformatics*. 2009;25: 1091–1093.  
616 doi:10.1093/bioinformatics/btp101
- 617 40. Shannon P, Markiel A, Ozier O, Baliga NS, Wang JT, Ramage D, et al. Cytoscape: A

- 618 Software Environment for Integrated Models of Biomolecular Interaction Networks.  
619 Genome Res. 2003;13: 2498–2504. doi:10.1101/gr.1239303.metabolite
- 620 41. Dennis G, Sherman BT, Hosack DA, Yang J, Gao W, Lane H, et al. DAVID: Database for  
621 Annotation, Visualization, and Integrated Discovery. Genome Biol. 2003;4: R60.  
622 doi:10.1186/gb-2003-4-9-r60
- 623

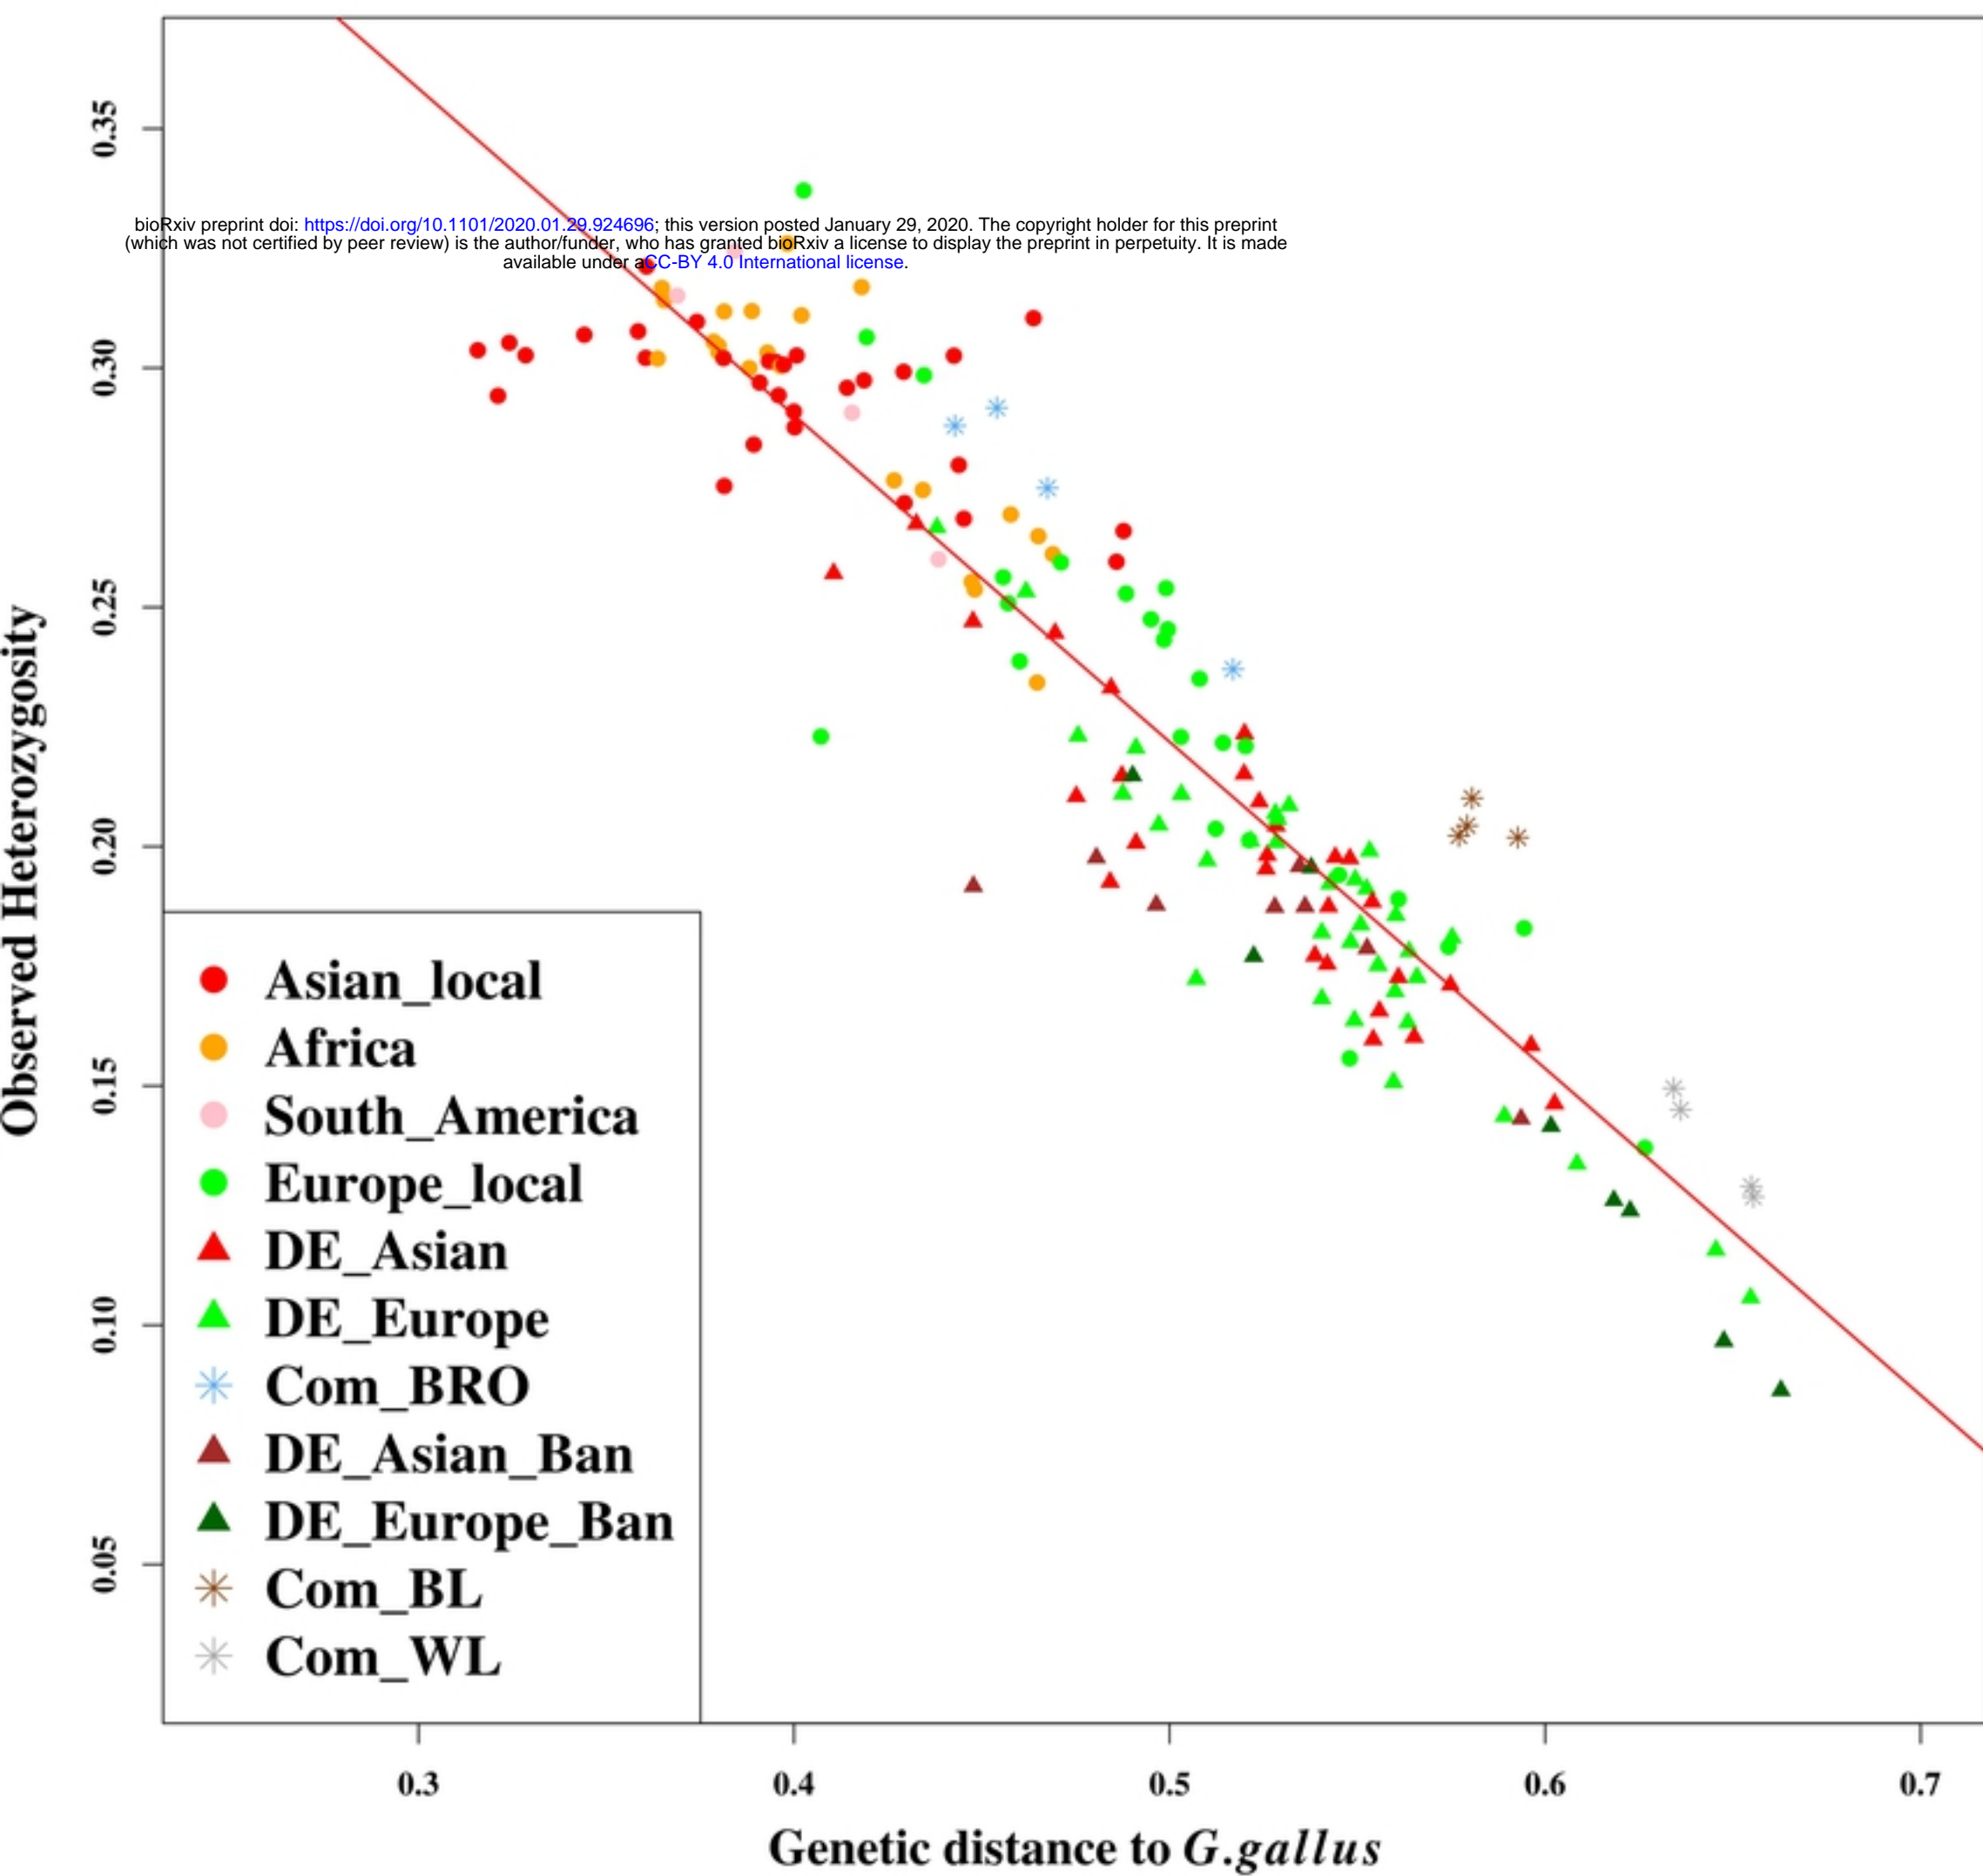

Figure 1

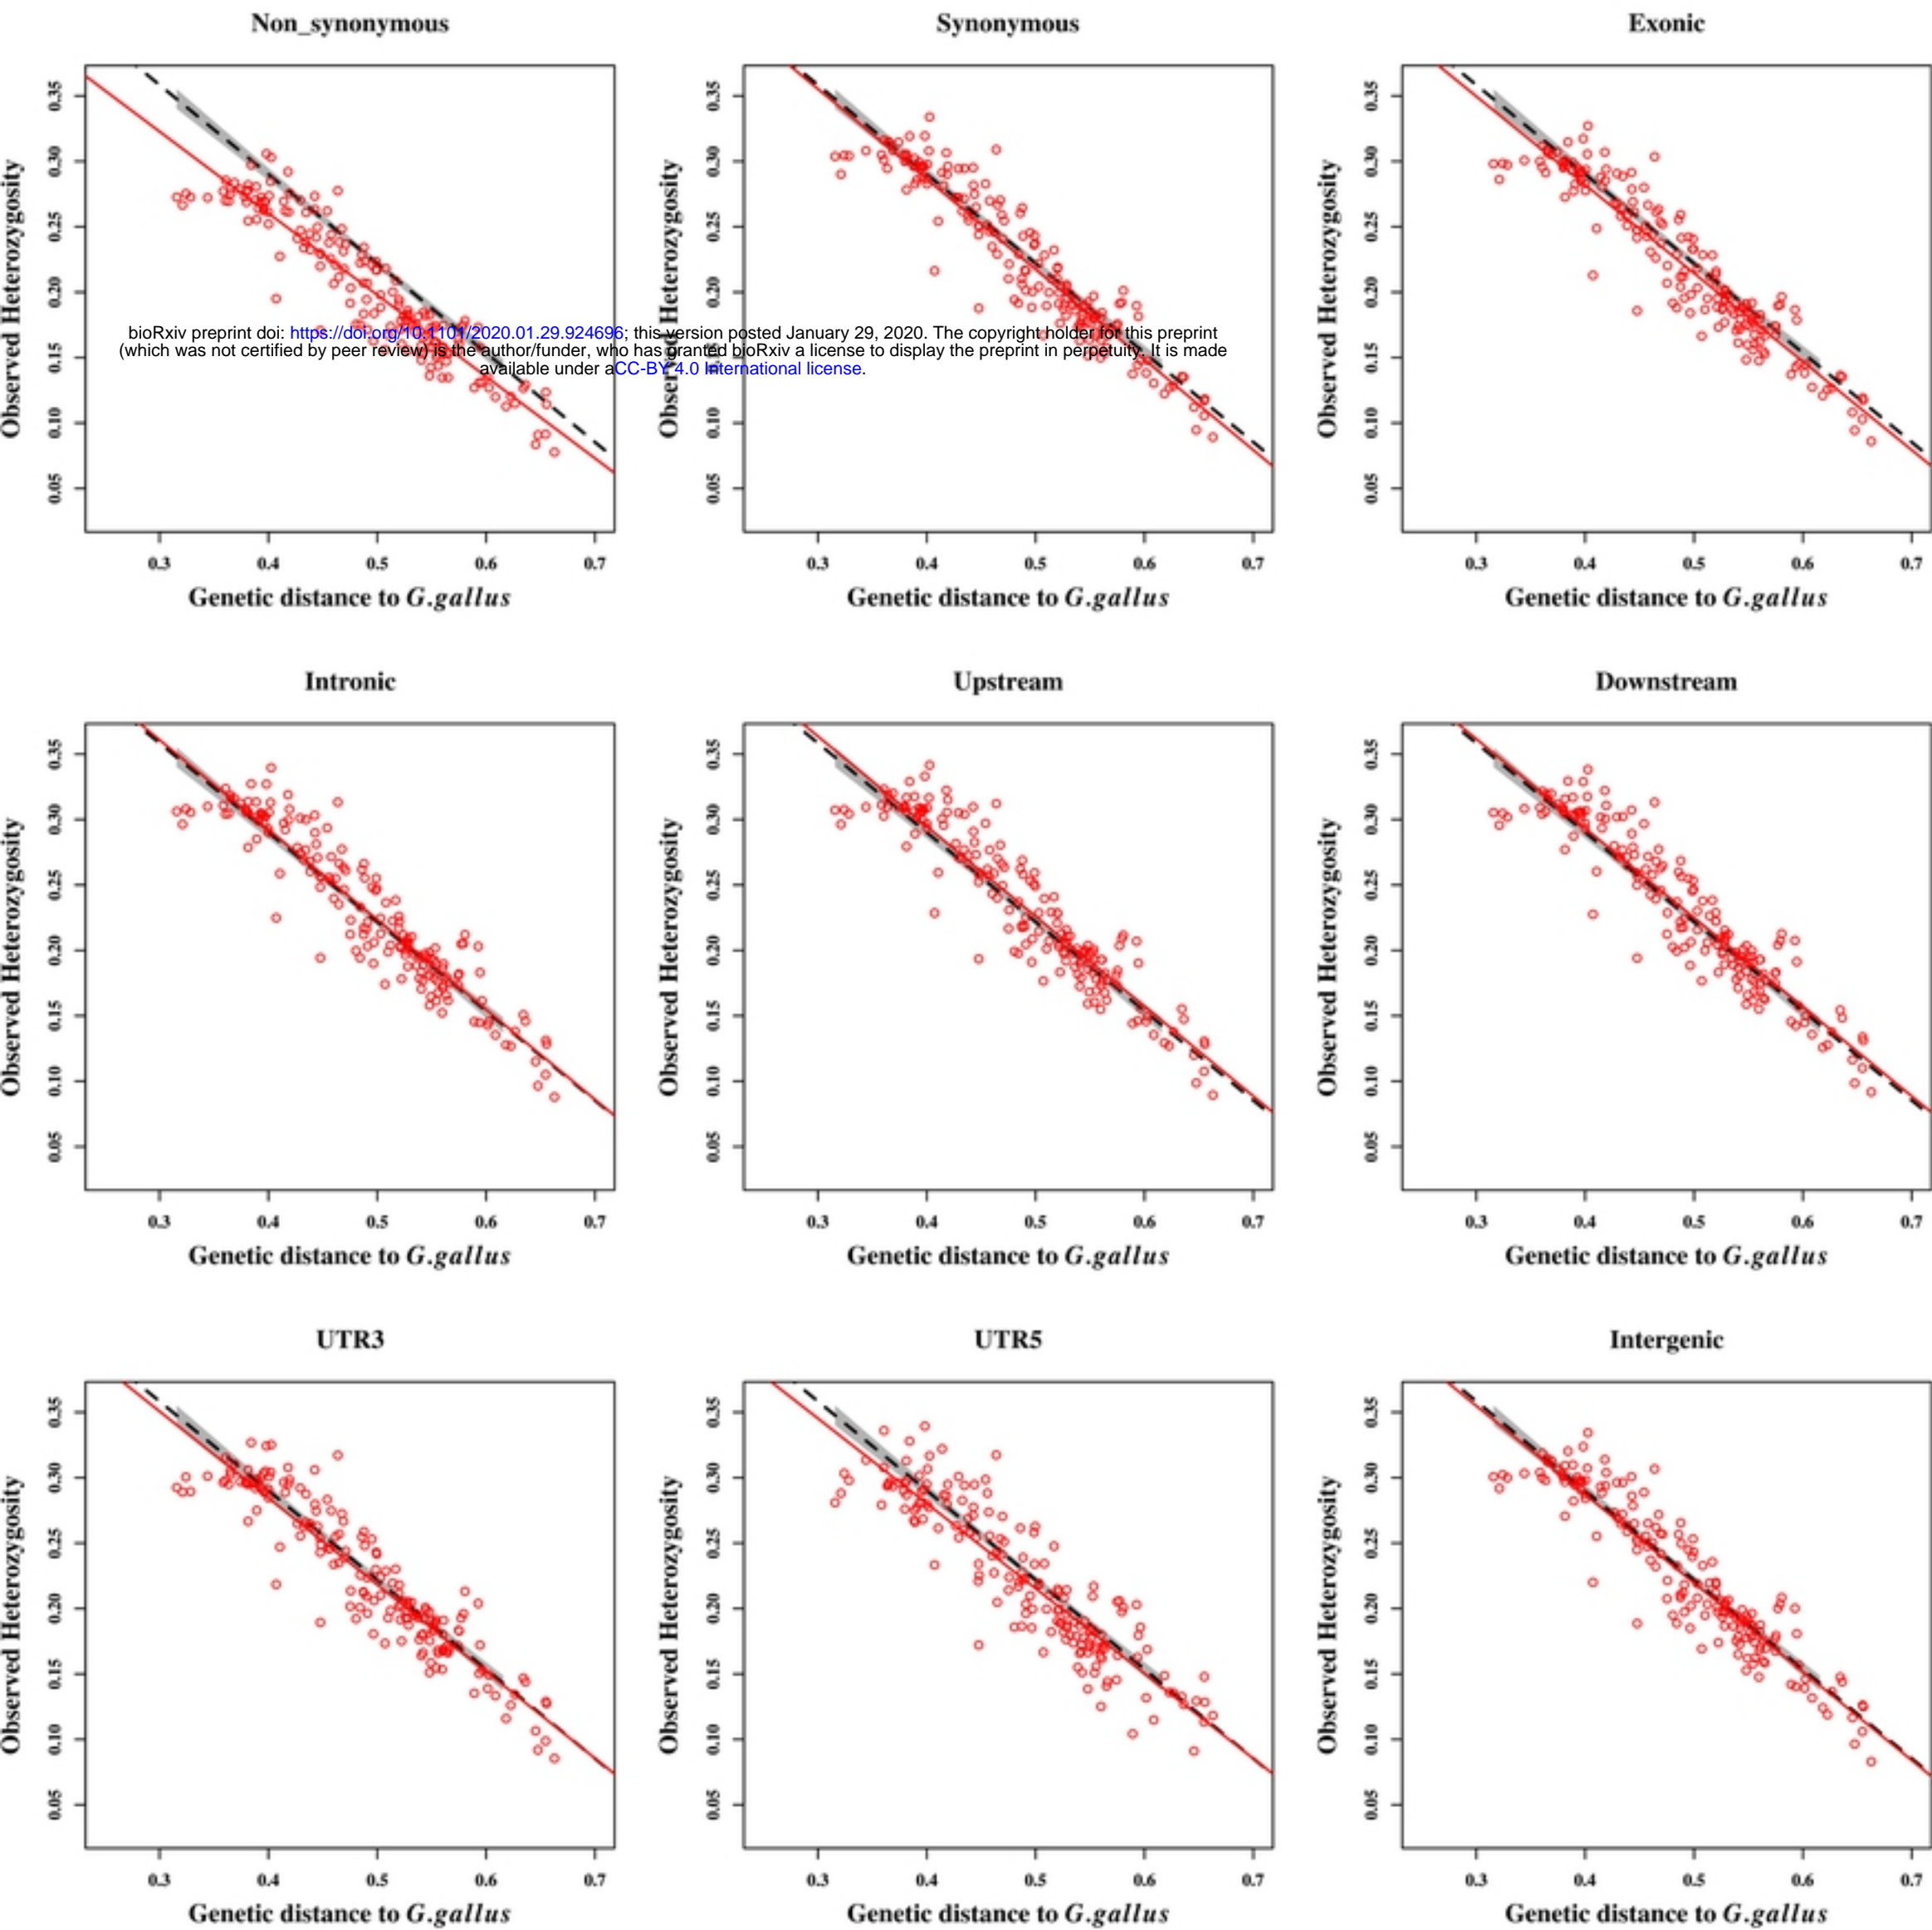

Figure 2

Observed Heterozygosity

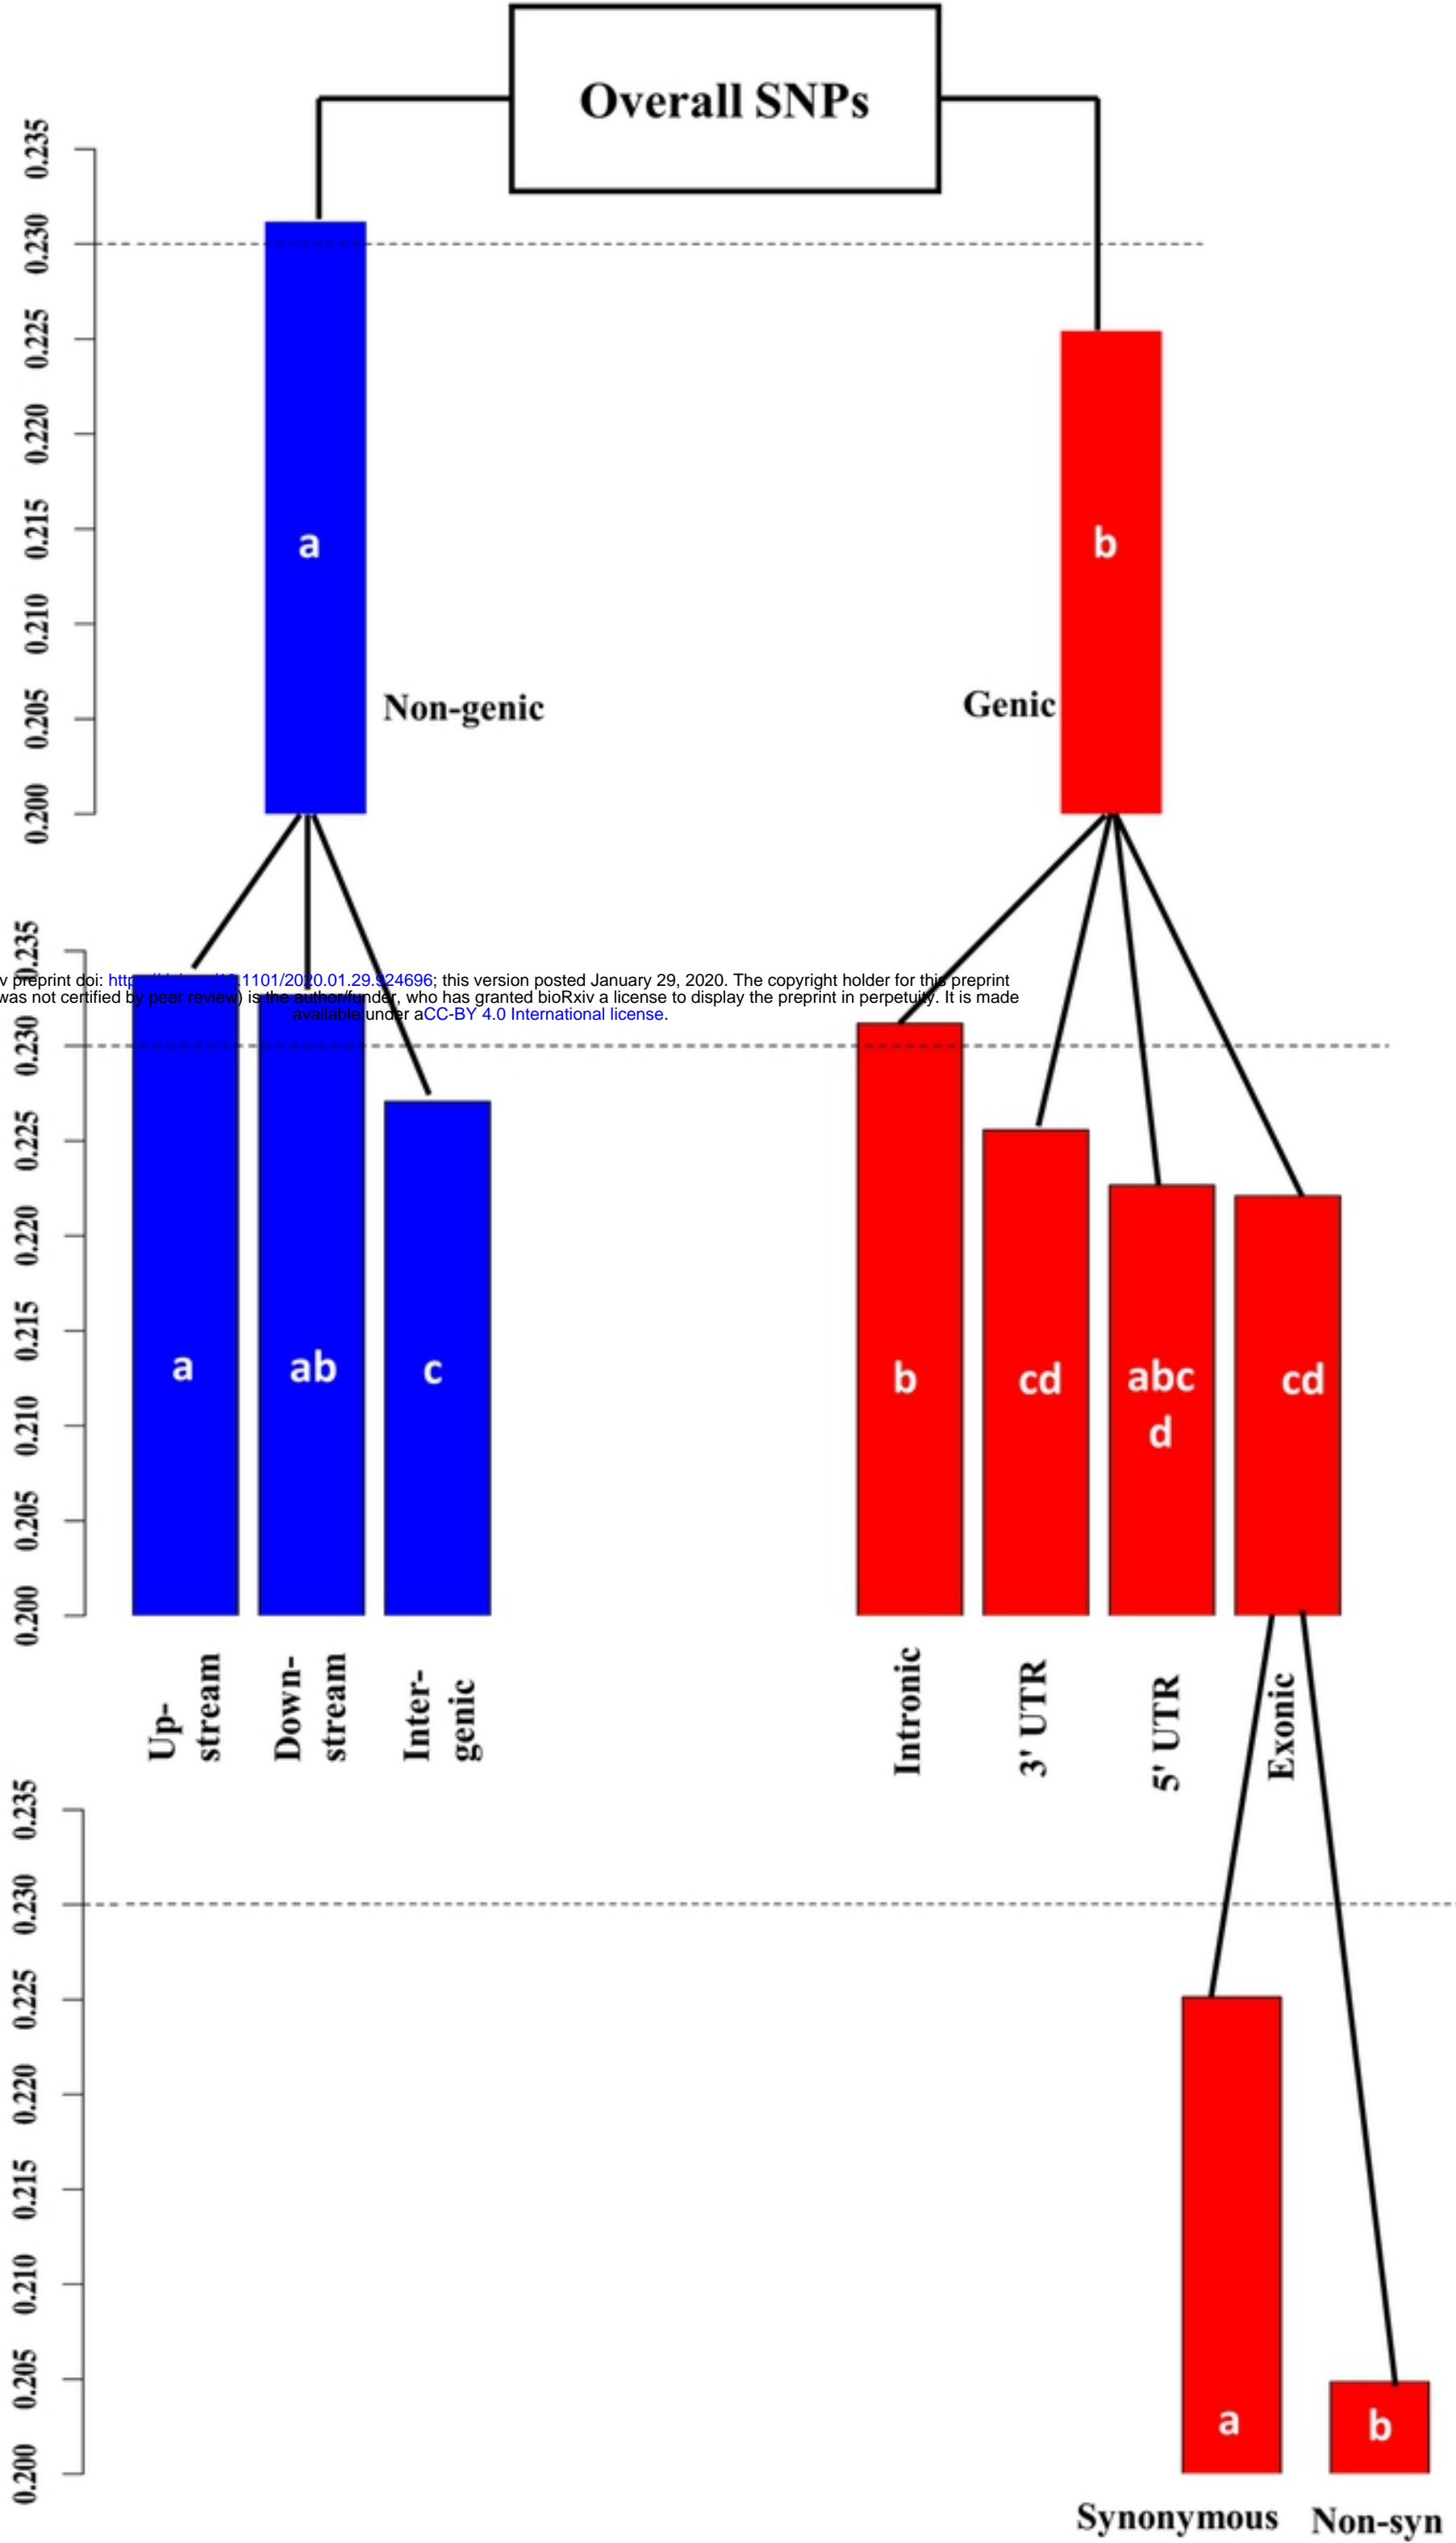

Figure 3
